# Supplementary material for: Magnetic and thermal properties of three ionothermally synthesized metal–carboxylate frameworks of [M3(ip)4][EMIm]2 (M = Co, Ni, Mn, H2ip = isophthalic acid, EMIm = 1-ethyl-3-methyl imidazolium)
Source: Royal Society of Chemistry journal article supplement (doi:10.1039/c1dt10070j), 2011-01-01
Supplement: c1dt10070j.pdf [file c1dt10070j.pdf]

## Supporting Information

# Magnetic and thermal properties of three ionothermally synthesized metal-carboxylate frameworks of $[M_3(ip)_4][EMIm]_2$ ( $M = Co, Ni, Mn$ , $ip =$ isophthalic acid, $EMIm =$ 1-ethyl-3-methyl imidazolium)

Wen-Xian Chen, Gui-Lin Zhuang, Hai-Xia Zhao, La-Sheng Long,\* Rong-Bin Huang and Lan-Sun Zheng

State Key Laboratory of Physical Chemistry of Solid Surface and Department of Chemistry, College of Chemistry and Chemical Engineering, Xiamen University, Xiamen 361005, China.

Email: [lslong@xmu.edu.cn](mailto:lslong@xmu.edu.cn)

### XMMAG Simulation Program

This program was written based on following algorithm: For  $N$  nuclear metal clusters, all spin wave functions can be derived from base sets  $\Psi_i = |M_{S_{i1}}, M_{S_{i2}}, M_{S_{i3}}, \dots, M_{S_{ij}}, \dots, M_{S_{iN}}\rangle$ , where  $M_{S_{ij}}$  is the  $j$  th microstate corresponding to the  $i$  th magnetic ion<sup>1</sup>. Each microstate  $M_{S_{ij}}$  can take a set of values:  $-S_i, -S_i + 1, -S_i + 2, \dots, S_i - 1, S_i$ , where  $S_i$  is the spin quantum number of the  $i$  th magnetic ion. The total  $M_{sT}$  value of the  $i$  base set, corresponding to total spin  $S_T$ , is  $M_{sT} = \sum M_{S_{ij}}$ .

The spin Hamiltonian of  $N$  nuclear metal clusters based on Heisengerg theory<sup>2</sup> is  $H = -2\sum J_{mn}S_mS_n$ . Base on the ladder operator of spin angular momentum, the spin Hamiltonian can be reduced to be following formula:  $H = -2\sum J_{mn} \{S_{mz}S_{nz} + (S_m^+ + S_n^-)/2\}$ . Moreover, the eigenvalue of the  $S_{mz}, S_m^+, S_n^-$  operator on the base set  $\Psi_i$  is  $S_{mz}\Psi_i = M_{S_{im}}\Psi_i, S_m^+\Psi_i = \sqrt{(S_m - M_{S_{im}})(S_m + M_{S_{im}} + 1)}\Psi_i, S_n^-\Psi_i = \sqrt{(S_n + M_{S_{in}})(S_n - M_{S_{in}} + 1)}\Psi_i$ . Thus the matrix corresponding to Hamiltonian with matrix element  $\langle\Psi_i|H|\Psi_j\rangle$  can be constructed. Given a set of  $J_{mn}$  value, the matrix can be diagonalized with the help of *LAPACK* package and generates a set of energy  $E_i$  corresponding to specific total spin number  $M_{sT}$ . Consequently, the molar magnetic susceptibility is derived from the Van Vleck equation<sup>2</sup>, as shown in

$$\chi_M = \frac{N\mu_B^2 g^2}{3kT} \frac{\sum M_{sT}(M_{sT} + 1)(2M_{sT} + 1)e^{-E_i/kT}}{\sum (2M_{sT} + 1)e^{-E_i/kT}}$$

Additionally, the inter-unit interaction  $zJ$  was taken into account based on the formula<sup>2</sup>

$$\chi_M^{mf} = \frac{\chi_M}{1 - 2zJ\chi_M/(Ng^2\mu_B^2)}$$

And the reliability factor of  $R$  is obtained by use of the formula<sup>2</sup>

$$R = \sum [(\chi_M T)_{obs} - (\chi_M^{mf} T)]^2 / \sum [(\chi_M T)_{obs}]^2$$

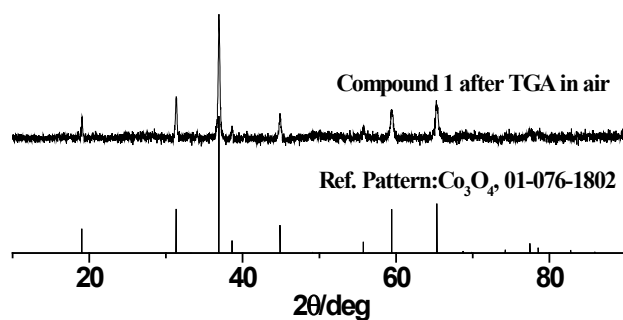

**Fig. S1.** X-ray powder diffraction for the residual product of **1** after TGA and the ref. pattern:  $\text{Co}_3\text{O}_4$ , 01-076-1802.

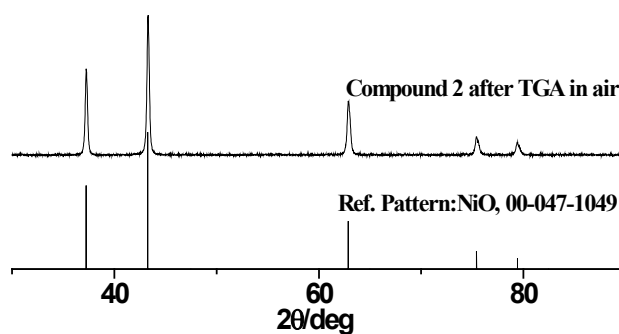

**Fig. S2.** X-ray powder diffraction for the residual product of **2** after TGA and the ref. pattern:  $\text{NiO}$ , 00-047-1049.

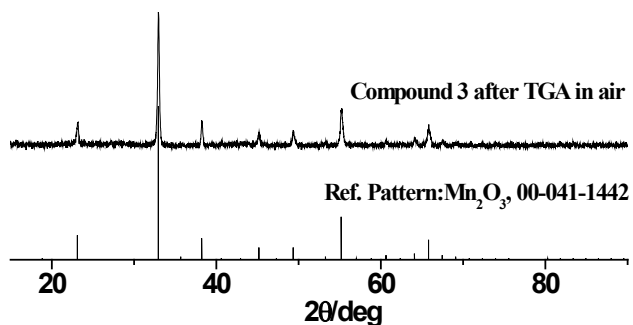

**Fig. S3.** X-ray powder diffraction for the residual product of **3** after TGA and the ref. pattern:  $\text{Mn}_2\text{O}_3$ , 00-041-1442.

1. N. S. Dalal, L. Nadjo, A. G. Marshall, et al. *Inorg. Chem.*, **2005**, 44, 9795.
2. O. Kahn, *Molecular Magnetism*; VCH: New York, **1993**; S. G. Vulfson, *Molecular Magnetochemistry*; Gordon and Breach Science: Newark, NJ, **1998**.
